# Supplementary material for: The siliconyl, boronyl, and iminoboryl ligands as analogues of the well-known carbonyl ligand: predicted reactivity towards dipolar cyclooligomerization in iron/cobalt carbonyl complexes
Source: Royal Society of Chemistry journal article supplement (doi:10.1039/c5ra01903f), 2015-01-01
Supplement: c5ra01903f1.pdf [file c5ra01903f1.pdf]

# The Siliconyl, Boronyl, and Iminoboryl Ligands as Analogues of the Well-known Carbonyl Ligand: Predicted Reactivity towards Dipolar Cyclooligomerization in Iron/Cobalt Carbonyl Complexes

Zhong Zhang,<sup>\*a,b</sup> Liang Pu,<sup>a</sup> Qian-shu Li,<sup>b</sup> R. Bruce King,<sup>\*c</sup>

<sup>a</sup> College of Science, Northwest A&F University, Yangling, Shanxi 712100, P. R. China

<sup>b</sup> School of Chemistry and Environment, South China Normal University, Key Laboratory of Theoretical Chemistry of Environment, Ministry of Education, Guangzhou, China 510006

<sup>c</sup> Department of Chemistry and Center for Computational Chemistry, University of Georgia, Athens, Georgia 30602, USA

## Supporting Information

### Theoretical Methods

Complete list of monomer and oligomer structures

### Thermochemistry

### Electronic Structure and Bonding Nature

**Tables S4-S17:** theoretical Cartesian coordinates for  $\text{Fe}_n(\text{CO})_{4n}(\text{SiO})_n$  (6 structures),  $\text{Co}_n(\text{CO})_{4n}(\text{BO})_n$  ( $n = 1$  to 5) (5 structures), and  $\text{Co}_m(\text{CO})_{4m}(\text{BNSiMe}_3)_m$  ( $n = 1$  to 3) (3 structures).

**Complete Gaussian 09 reference (Reference 48)**

## 1. Theoretical Methods

Morokuma Energy Decomposition Analyses (EDA)<sup>1</sup> were carried out for selected BP86 structures at the BP86/DZP level using the program package ADF.<sup>2</sup> The bonding dissociation energy is divided into two physically appealing entities:

$$\Delta E = \Delta E_{\text{prep}} + \Delta E_{\text{int}}$$

The preparation energy ( $\Delta E_{\text{prep}}$ ) is the energy required to promote the two fragments (A and B) from their isolated equilibrium geometry to the geometry that they have in the compound AB. The interaction energy ( $\Delta E_{\text{int}}$ ) is the interaction between the two prepared fragments in the molecule. In this study,  $\Delta E_{\text{prep}}$  is sufficiently small to be neglected, so that only  $\Delta E_{\text{int}}$  needs to be considered. This interaction energy can be separated into three major components:

$$\Delta E_{\text{int}} = \Delta E_{\text{els}} + \Delta E_{\text{Pauli}} + \Delta E_{\text{orb}}$$

In this equation the first term  $\Delta E_{\text{els}}$  is the electrostatic interaction energy between the fragments, which is calculated using a frozen electron density distribution at the geometry of the complex. The second term  $\Delta E_{\text{Pauli}}$  is the repulsive energy caused by Pauli repulsion. The last term  $\Delta E_{\text{orb}}$  is the stabilization energy from relaxed orbital interaction between the prepared fragments. The  $\Delta E_{\text{orb}}$  term can be further broken down into orbital contributions from different irreducible representations. This allows the prediction of separate energy contributions from  $\sigma$  and  $\pi$  interactions.

## 2. Complete list of monomer and oligomer structures

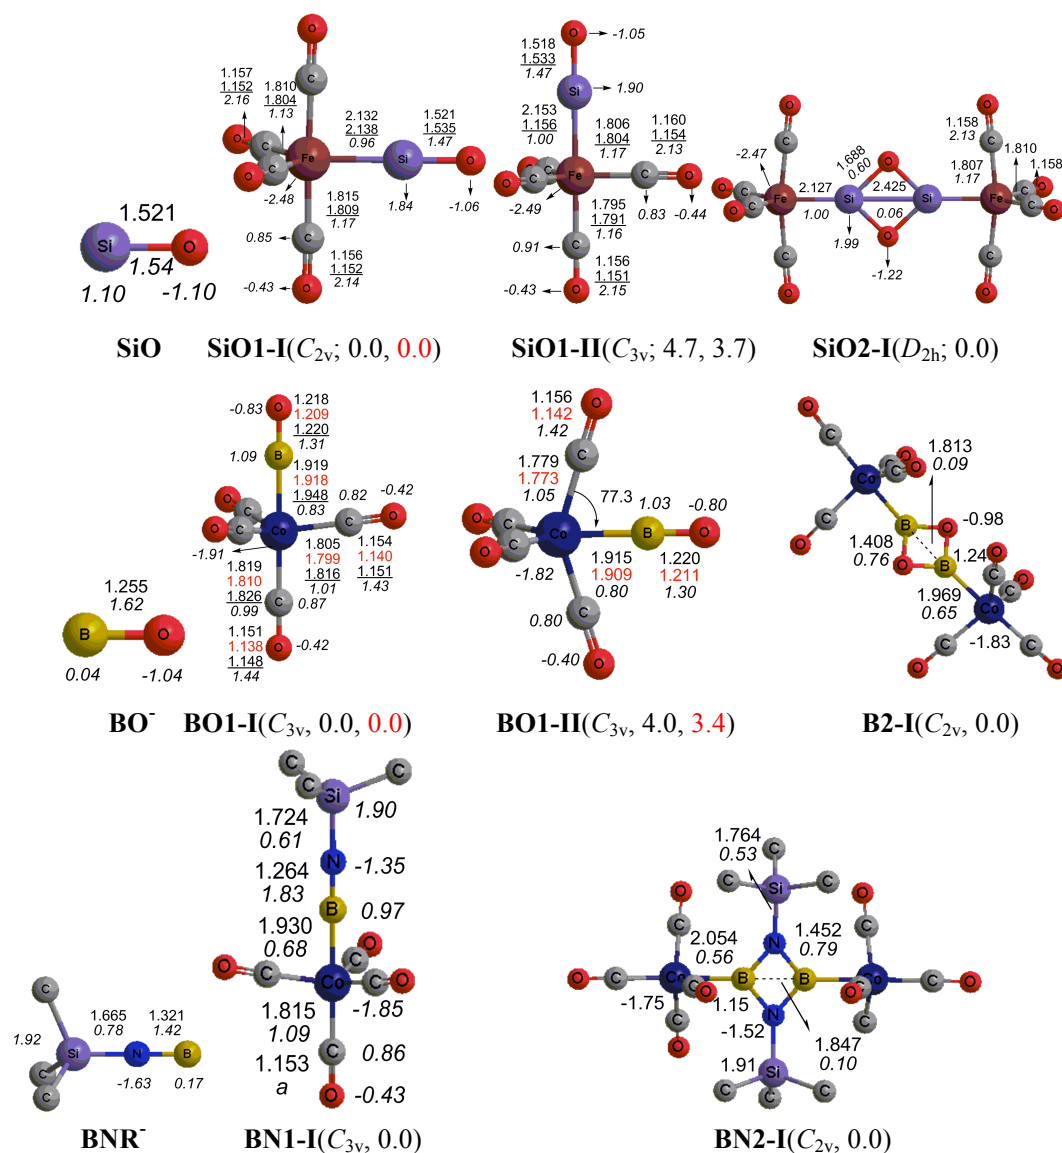

**Figure S1.** Optimized  $Fe_n(CO)_{4n}(SiO)_n$ ,  $Co_n(CO)_{4n}(BO)_n$ , and  $Co_n(CO)_{4n}(BNSiMe_3)_n$  ( $n = 1, 2$ ) structures. The symmetry and relative free energies (unit in kcal/mol) are given in parenthesis. Hydrogen atoms are omitted for clarity. The Wiberg bond indices (WBIs) as well as the Natural Charges are given in italics. The bond distances are given in Å. The red bond distances and red relative energies are given by M06L/TZ2P level's calculation. The earlier theoretical parameters of  $Fe(CO)_4(SiO)^3$  and  $Co(CO)_4(BO)^4$  are given in underlined.

The metastable structures, i.e. **SiO1-II**, and **BO1-II**, are found to be transition states, lying 4.7 kcal/mol and 4.0 kcal/mol above their global minima **SiO1-I**, and **BO1-I**, respectively. In addition, the M06L/TZ2P level optimized structures as well as relative energies are quite closed to that of M06L/DZP level (Fig. S1). Our predicted  $Fe(CO)_4(SiO)$  structures parameters (**SiO1-I** and **SiO1-II** in Fig. S1) are well consistent with the MP2 values with averaged differences less than 0.01 Å.3

Moreover, our predicted **BO1-I** structure parameters are better than the earlier LDA parameters by averaged differences of  $\sim 0.02$  Å.

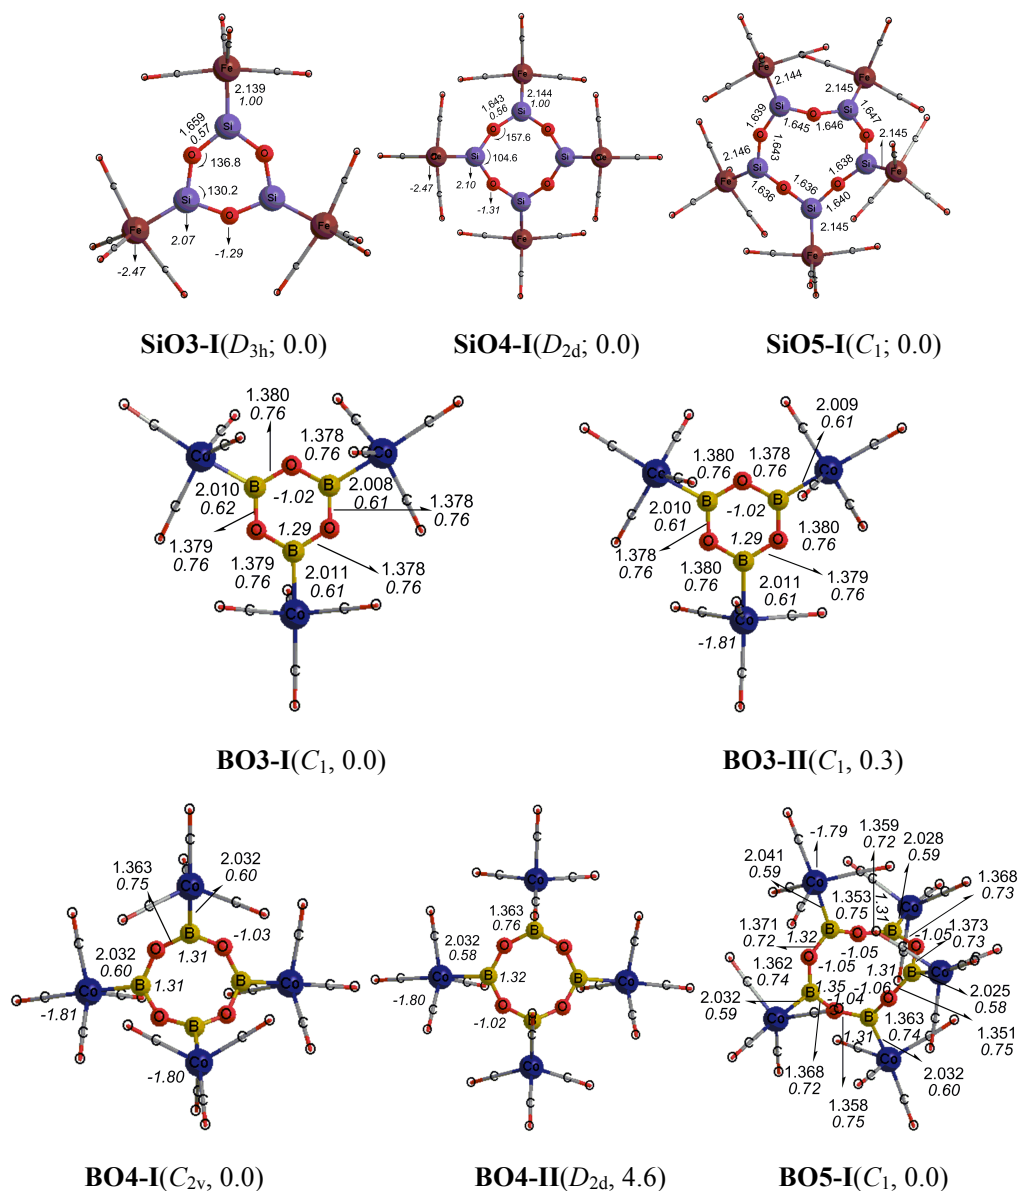

**Figure S2.** Optimized  $\text{Fe}_n(\text{CO})_{4n}(\text{Si}_n\text{O}_n)$ ,  $\text{Co}_n(\text{CO})_{4n}(\text{B}_n\text{O}_n)$ , and ( $n = 3 \sim 5$ ) structures. The symmetry and relative free energies (unit in kcal/mol) are given in parenthesis. Selected Wiberg bond indices (WBIs) are given in italics. The bond distances are given in Å.

The second lowest energy  $\text{Co}_3(\text{CO})_{12}(\text{B}_3\text{O}_3)$  and  $\text{Co}_4(\text{CO})_{16}(\text{B}_4\text{O}_4)$  structures, namely **BO3-II** and **BO4-II**, are analogous to the global minima structures **BO3-I** and **BO4-I**, but different with the arrangement of the three equatorial CO groups of  $\text{Co}(\text{CO})_4$  fragments. Such difference leads to a smaller relative energy of 0.3 kcal/mol and 4.6 kcal/mol above **BO3-I** and **BO4-I**. Thus,  $\text{Co}_3(\text{CO})_{12}(\text{B}_3\text{O}_3)$  and  $\text{Co}_4(\text{CO})_{16}(\text{B}_4\text{O}_4)$  molecules are potential fluxional systems.

### 3. Thermochemistry

In order to investigate the stability of  $M_n(\text{CO})_{4n}(\text{L}_n)$ , several different reactions are reported in Table S1, including bond dissociation energies (BDEs) in terms of the ligand ( $\text{BO}^-$ ,  $\text{BNSiMe}_3^-$ , and  $\text{SiO}$ ) dissociation steps, as well as possible  $M_n(\text{CO})_{4n}(\text{L}_n)$  formation energies from mononuclear or smaller oligomers.

**Table S1.** Reaction energies (in kcal/mol) for the reported structures.

| Reactions                                                                                                                         | L=SiO             |             | L=BO <sup>-</sup> |             | L=BNR <sup>-</sup> |             |
|-----------------------------------------------------------------------------------------------------------------------------------|-------------------|-------------|-------------------|-------------|--------------------|-------------|
|                                                                                                                                   | $-\Delta E_{zpe}$ | $-\Delta G$ | $-\Delta E_{zpe}$ | $-\Delta G$ | $-\Delta E_{zpe}$  | $-\Delta G$ |
| $2\text{M}(\text{CO})_4(\text{L}) \rightarrow \text{M}_2(\text{CO})_8(\text{L}_2)$                                                | 73.9              | 61.1        | 33.3              | 20.8        | 48.2               | 25.7        |
| $3\text{M}(\text{CO})_4(\text{L}) \rightarrow \text{M}_3(\text{CO})_{12}(\text{L}_3)$                                             | 146.6             | 120.6       | 91.9              | 66.0        | 57.4               | 10.6        |
| $4\text{M}(\text{CO})_4(\text{L}) \rightarrow \text{M}_4(\text{CO})_{16}(\text{L}_4)$                                             | 200.9             | 158.5       | 121.1             | 82.0        | --                 | --          |
| $5\text{M}(\text{CO})_4(\text{L}) \rightarrow \text{M}_5(\text{CO})_{20}(\text{L}_5)$                                             | 254.6             | 199.2       | 159.7             | 103.8       | --                 | --          |
| $\text{M}(\text{CO})_4(\text{L}) + \text{M}_2(\text{CO})_8(\text{L}_2) \rightarrow \text{M}_3(\text{CO})_{12}(\text{L}_3)$        | 72.7              | 59.4        | 58.6              | 45.2        | 9.2                | -15.1       |
| $\text{M}(\text{CO})_4(\text{L}) + \text{M}_3(\text{CO})_{12}(\text{L}_3) \rightarrow \text{M}_4(\text{CO})_{16}(\text{L}_4)$     | 54.3              | 38.0        | 29.1              | 16.0        | --                 | --          |
| $\text{M}(\text{CO})_4(\text{L}) + \text{M}_4(\text{CO})_{16}(\text{L}_4) \rightarrow \text{M}_5(\text{CO})_{20}(\text{L}_5)$     | 53.7              | 40.7        | 38.6              | 21.8        | --                 | --          |
| $2\text{M}_2(\text{CO})_8(\text{L}_2) \rightarrow \text{M}_4(\text{CO})_{16}(\text{L}_4)$                                         | 53.1              | 36.2        | 54.4              | 40.4        | --                 | --          |
| $\text{M}_2(\text{CO})_8(\text{L}_2) + \text{M}_3(\text{CO})_{12}(\text{L}_3) \rightarrow \text{M}_5(\text{CO})_{20}(\text{L}_5)$ | 34.1              | 17.5        | 34.4              | 17.0        | --                 | --          |
| $\text{M}(\text{CO})_4 + \text{L} \rightarrow \text{M}(\text{CO})_4(\text{L})$                                                    | 46.0              | 35.5        | 231.4             | 220.5       | 234.2              | 223.5       |

The  $\text{Fe}(\text{CO})_4 \leftarrow (\text{SiO})$  bond dissociation energy (*BDE*) is predicted to be 46.0 kcal/mol, which is slightly stronger than the experimental value of 37.0 kcal/mol for the *BDE* of  $\text{Fe}(\text{CO})_4 \leftarrow (\text{CO})$ .<sup>5</sup> Furthermore, the  $\text{Co}(\text{CO})_4 \leftarrow \text{L}$  ( $\text{L} = \text{BO}^-$ ,  $\text{BNSiMe}_3^-$ ) are predicted to be 231.4 and 234.2 kcal/mol per cobalt atom, obviously indicating extremely strong  $\text{Co}(\text{CO})_4 \leftarrow \text{L}$  interactions arising from ionic interaction between  $[\text{Co}(\text{CO})_4]^+$  and  $\text{L}^-$  as well as the strong  $\sigma$  donation from  $\text{L}^-$  to  $[\text{Co}(\text{CO})_4]^+$  (for details see the **binding nature** in the ESI). Comparing with the  $\text{M} \leftarrow \text{CO}$  interaction, the stronger  $\text{M} \leftarrow \text{L}$  interactions ( $\text{L} = \text{BO}^-$ ,  $\text{BNSiMe}_3^-$ ) therefore suggest that the reactive L ligands are well captured in the metal complexes.

The free energies of formation for  $M_n(\text{CO})_{4n}(\text{L}_n)$  from monomers or smaller oligomers (Table S2) indicate the thermodynamic instability of mononuclear  $\text{M}(\text{CO})_4(\text{L})$  or oligomers  $\text{M}_{n-1}(\text{CO})_{4n-1}(\text{L}_{n-1})$ , since the formation of  $M_n(\text{CO})_{4n}(\text{L}_n)$  always release free energy. Note that the zero-point corrected total electronic energy of formation for  $[\text{Co}(\text{CO})_4]_3(\text{B}_3\text{N}_3\text{Si}_3\text{Me}_9)$  is predicted to be 9.2 kcal/mol. However the free energy of formation is found to require 15.1 kcal/mol compensation, since three bulky  $\text{SiMe}_3$  groups in **BN3-I** increase the steric repulsion as well as entropy effect. Furthermore, the most likely oligomerization process might be  $\text{M}(\text{CO})_4(\text{L}) + \text{M}_{n-1}(\text{CO})_{4n-1}(\text{L}_{n-1}) \rightarrow \text{M}_n(\text{CO})_{4n}(\text{L}_n)$ , because of the considerable free energy release and the smaller steric repulsion between mononuclear and smaller oligomers.

## 4 Electronic Structure and Bonding Nature

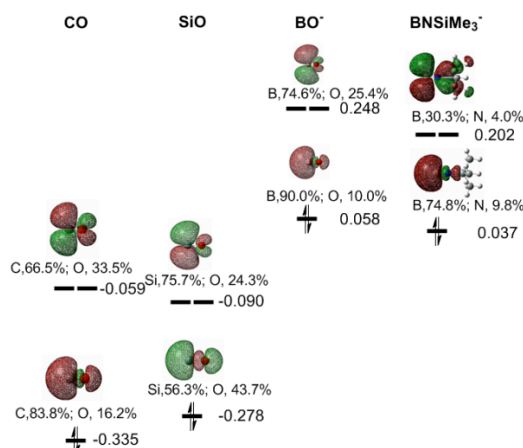

**Figure S3.** Comparing the frontier orbitals of CO, SiO, BO<sup>-</sup>, and BNSiMe<sub>3</sub><sup>-</sup>.

**Table S3.** Energy decomposition analysis of Fe<sub>n</sub>(CO)<sub>4n</sub>(Si<sub>n</sub>O<sub>n</sub>), Co<sub>n</sub>(CO)<sub>n4</sub>(B<sub>n</sub>O<sub>n</sub>), and Co<sub>n</sub>(CO)<sub>4n</sub>(B<sub>n</sub>N<sub>n</sub>Si<sub>n</sub>Me<sub>3n</sub>) (unit in kcal/mol).

|                             | Fe(CO) <sub>5</sub> | SiO1-II | BO1-I  | BN1-I  | SiO2-I                 | BO2-I      | SiO3-1                 | BO3-1   |
|-----------------------------|---------------------|---------|--------|--------|------------------------|------------|------------------------|---------|
| $\Delta E_{\text{int}}$     | -55.0               | -47.7   | -252.2 | -264.9 | -63.7                  | -263.1     | -65.4                  | -266.2  |
| $\Delta E_{\text{Paul}}$    | 128.8               | 108.7   | 260.9  | 289.2  | 150.6                  | 258.3      | 148.7                  | 236.1   |
| $\Delta E_{\text{els}}$     | -91.9               | -65.6   | -335.3 | -354.3 | -113.4                 | -295.5     | -113.2                 | -262.1  |
| $\Delta E_{\text{ster}}$    | 36.8                | 43.1    | -74.4  | -65.0  | 37.3                   | -37.2      | 35.6                   | -26.0   |
| $\Delta E_{\text{orb}}$     | -89.5               | -88.7   | -175.1 | -195.9 | -96.5                  | -219.5     | -95.1                  | -232.09 |
| a <sub>1</sub> <sup>*</sup> | -48.0               | -58.4   | -152.5 | -165.4 | -59.6                  | -211.3(a') | -58.9                  | ---     |
| b <sub>2</sub>              | 0.0                 | -0.1    | -0.2   | -0.3   | -11.7                  | -8.2(a'')  | -11.1                  | ---     |
| e <sub>1</sub> <sup>*</sup> | -41.5               | -30.2   | -22.4  | -30.3  | -24.9(b <sub>1</sub> ) | ...        | -24.7(b <sub>1</sub> ) | ---     |

\*The a<sub>1</sub> presents the M←L σ donation, and the e<sub>1</sub> term means the M→L π\* back donation.

The frontier orbitals of CO, SiO, BO<sup>-</sup>, and BNSiMe<sub>3</sub><sup>-</sup> are compared in both shape and energy (Figure S4). The HOMO of these ligands (CO, SiO, BO<sup>-</sup>, BNR<sup>-</sup>) should be viewed as mainly the lone pair electrons localized on the carbon (percentage of 83.8% for CO), silicon (percentage of 56.3% for SiO), and boron atoms (percentage of 90.0% for BO<sup>-</sup>, and percentage of 74.8% for BNR<sup>-</sup>). For the corresponding LUMOs, the contributions of the carbon, silicon, and boron atoms are found to be 66.5% for C(O), 75.7% for Si(O), 74.6% for B(O), and 30.3% for B(NR), respectively. The HOMO and LUMO energies of these ligands can be divided into positive and negative groups, where the neutral CO and SiO belong to the negative group, and the overcharged BO<sup>-</sup> and BNR<sup>-</sup> belong to the positive one.

In the trigonal bipyramidal Co(CO)<sub>4</sub>(BO), the boronyl prefers the more spatial axial position to accommodate the 90.0% lone-pair electrons locating on the B(O). In contrast, the siliconyl in Fe(CO)<sub>4</sub>(SiO) favors the equatorial position since the

relatively smaller contribution of the lone pair electrons of 56.3% on Si(O) leads to the equatorial position with less *trans-influence*.

The *BDEs* of Fe(CO)<sub>5</sub> and Fe(CO)<sub>4</sub>(SiO) are essentially identical, as indicated by our predicted Fe(CO)<sub>4</sub>←(SiO) *BDE* of 46.0 kcal/mol and the earlier MP2 Fe(CO)<sub>4</sub>←(CO) *BDE* of 46.9 kcal/mol.<sup>6</sup> However, the M←L σ donation and M→L π\* back donation in Fe(CO)<sub>5</sub> and Fe(CO)<sub>4</sub>(SiO) are obviously different from each other, since the ratio of σ donation/π\* back donation in Fe(CO)<sub>5</sub> is predicted to be 1.16 (slightly stronger σ donation), but the ratio in Fe(CO)<sub>4</sub>(SiO) is found to be 1.93 (much stronger σ donation). Comparing with the carbon atom in carbonyl, the softer silicon atom in siliconyl can more readily donate than accept electrons. In addition, the binding nature between the positively charged [Co(CO)<sub>4</sub>]<sup>+</sup> fragment and the negatively charged ligands (BO<sup>-</sup> and BNR<sup>-</sup>) are strongly different from that in Fe(CO)<sub>4</sub>←(CO), since the ionic interactions as well as the [M]←(L) (L= BO<sup>-</sup>, BNR<sup>-</sup>) interactions lead to the much stronger interaction energies (*E*<sub>ints</sub>). Actually, the *E*<sub>ints</sub> of [Co(CO)<sub>4</sub>]←(L) are reported to be -252.2 kcal/mol for Co(CO)<sub>4</sub>(BO), and -264.9 kcal/mol for Co(CO)<sub>4</sub>(BNR), which are nearly five times that of Fe(CO)<sub>5</sub> or Fe(CO)<sub>4</sub>(SiO). Thus the *E*<sub>ints</sub> originated from the attractive steric interactions (*E*<sub>sterS</sub>) (-70.0 ± 5.0 kcal/mol) for [Co(CO)<sub>4</sub>]←(L) rather than the repulsive *E*<sub>sterS</sub> (40.0 ± 4.0 kcal/mol) for Fe(CO)<sub>5</sub> or Fe(CO)<sub>4</sub>(SiO), and stronger orbital interactions (*E*<sub>orbS</sub>) (-185 ± 10.0 kcal/mol) for [Co(CO)<sub>4</sub>]←(L). The stronger *E*<sub>orbS</sub>, nearly twice that of the *E*<sub>orbS</sub> of Fe(CO)<sub>5</sub> or Fe(CO)<sub>4</sub>(SiO), mainly comes from the stronger σ donation instead of the weaker π\* back donation.

In the dimers (**SiO2-I** and **BO2-I**) and trimers (**SiO3-I** and **BO3-I**), the *E*<sub>ints</sub> with respect to [M<sub>n</sub>(CO)<sub>4n</sub>]←(L) (M= Fe, Co; L = Si<sub>n</sub>O<sub>n</sub>, B<sub>n</sub>O<sub>n</sub>; n = 2, 3) increase further from -47.7 kcal/mol for Fe(CO)<sub>4</sub>(SiO) and -252.2 kcal/mol for Co(CO)<sub>4</sub>(BO) to -64.5 ± 1.0 kcal/mol for Fe<sub>n</sub>(CO)<sub>4n</sub>(Si<sub>n</sub>O<sub>n</sub>) and -264.7 ± 1.0 for Co<sub>n</sub>(CO)<sub>4n</sub>(B<sub>n</sub>O<sub>n</sub>), which mainly originate from the gradually increased σ donation of [M<sub>n</sub>(CO)<sub>4n</sub>]←(L) attributed to the more polarized Si-O/B-O bonds in the Si<sub>n</sub>O<sub>n</sub>/B<sub>n</sub>O<sub>n</sub>.

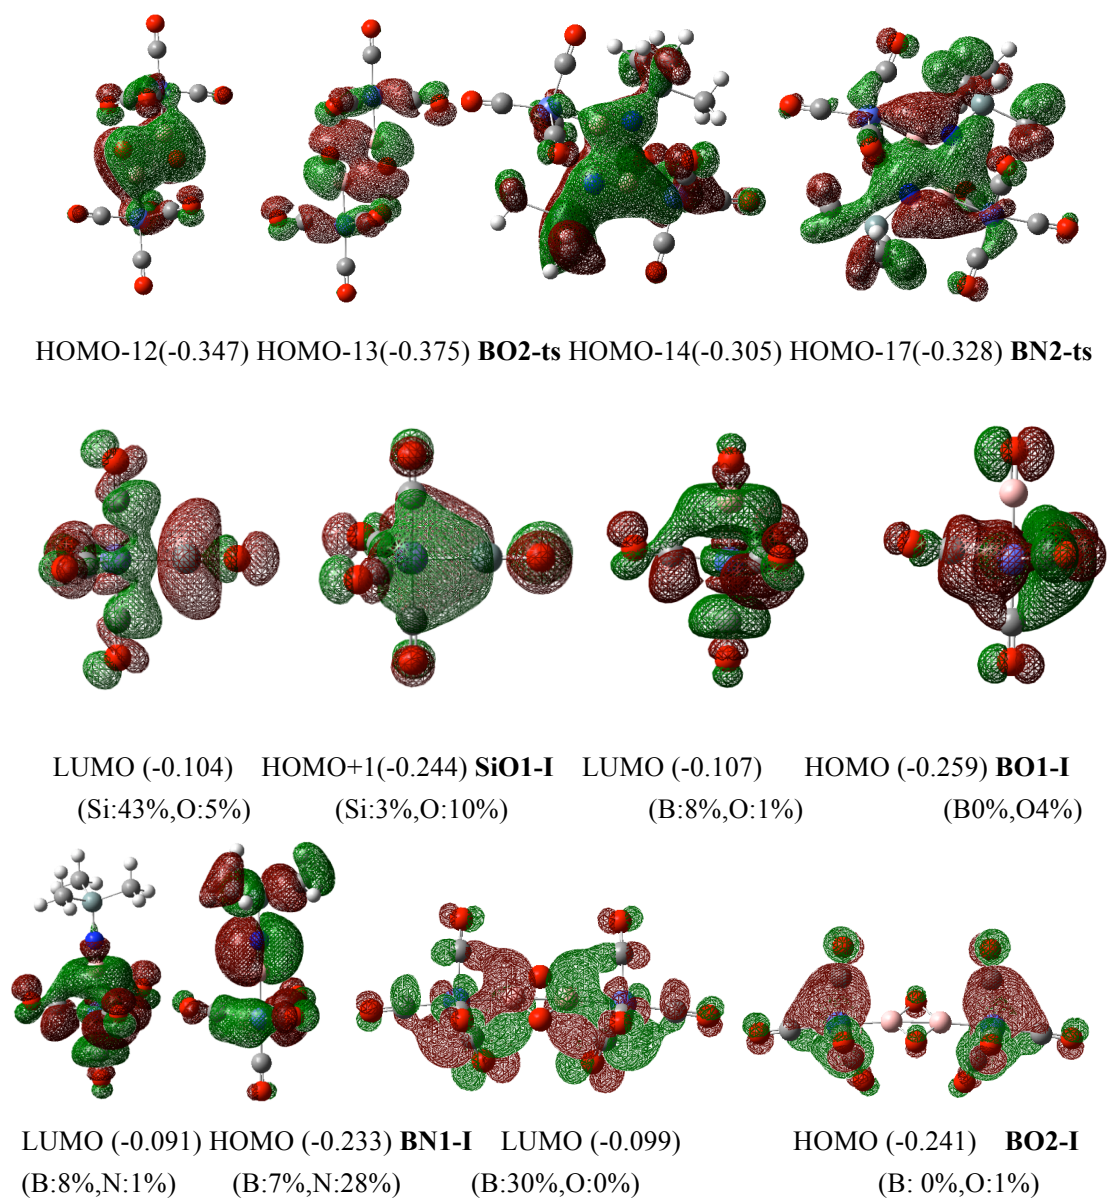

**Figure S4.** Some important occupied orbitals for monomer, dimers, and transition states. The orbital energies are given in a. u. The partial atoms contribution are given in the second line parenthesis.



**Table S4.** The theoretical Cartesian coordinates (in Å) for the structure **SiO1-I** using the M06L/DZP method

Standard orientation:

| Center Number | Atomic Number | Atomic Type | Coordinates (Angstroms) |           |           |
|---------------|---------------|-------------|-------------------------|-----------|-----------|
|               |               |             | X                       | Y         | Z         |
| 1             | 26            | 0           | 0.000000                | 0.000000  | 0.250547  |
| 2             | 6             | 0           | 0.000000                | 1.580319  | 1.132656  |
| 3             | 6             | 0           | 0.000000                | -1.580319 | 1.132656  |
| 4             | 6             | 0           | 1.814502                | 0.000000  | 0.216763  |
| 5             | 8             | 0           | 0.000000                | 2.582050  | 1.711786  |
| 6             | 8             | 0           | -2.970630               | 0.000000  | 0.216246  |
| 7             | 8             | 0           | 0.000000                | -2.582050 | 1.711786  |
| 8             | 8             | 0           | 0.000000                | 0.000000  | -3.402140 |
| 9             | 8             | 0           | 2.970630                | 0.000000  | 0.216246  |
| 10            | 6             | 0           | -1.814502               | 0.000000  | 0.216763  |
| 11            | 14            | 0           | 0.000000                | 0.000000  | -1.881332 |

Sum of electronic and zero-point Energies= -2081.830214  
Sum of electronic and thermal Free Energies= -2081.870280

**Table S5.** The theoretical Cartesian coordinates (in Å) for the structure **SiO1-II** using the M06L/DZP method

Standard orientation:

| Center Number | Atomic Number | Atomic Type | Coordinates (Angstroms) |           |           |
|---------------|---------------|-------------|-------------------------|-----------|-----------|
|               |               |             | X                       | Y         | Z         |
| 1             | 26            | 0           | 0.000000                | 0.000000  | 0.239874  |
| 2             | 6             | 0           | 0.000000                | 1.806312  | 0.224827  |
| 3             | 6             | 0           | 1.564312                | -0.903156 | 0.224827  |
| 4             | 6             | 0           | -1.564312               | -0.903156 | 0.224827  |
| 5             | 6             | 0           | 0.000000                | 0.000000  | 2.035288  |
| 6             | 14            | 0           | 0.000000                | 0.000000  | -1.913410 |
| 7             | 8             | 0           | 0.000000                | 2.965434  | 0.258949  |
| 8             | 8             | 0           | 0.000000                | 0.000000  | -3.431121 |
| 9             | 8             | 0           | -2.568141               | -1.482717 | 0.258949  |
| 10            | 8             | 0           | 2.568141                | -1.482717 | 0.258949  |
| 11            | 8             | 0           | 0.000000                | 0.000000  | 3.190824  |

Sum of electronic and zero-point Energies= -2081.823195  
Sum of electronic and thermal Free Energies= -2081.863692

**Table S6.** The theoretical Cartesian coordinates (in Å) for the structure **BO1-I** using the M06L/DZP method

Standard orientation:

| Center<br>Number                             | Atomic<br>Number | Atomic<br>Type | Coordinates (Angstroms) |           |           |
|----------------------------------------------|------------------|----------------|-------------------------|-----------|-----------|
|                                              |                  |                | X                       | Y         | Z         |
| 1                                            | 27               | 0              | 0.000000                | 0.000000  | 0.148017  |
| 2                                            | 6                | 0              | 0.000000                | 0.000000  | 1.967303  |
| 3                                            | 6                | 0              | 0.000000                | 1.789377  | -0.092496 |
| 4                                            | 6                | 0              | -1.549646               | -0.894689 | -0.092496 |
| 5                                            | 6                | 0              | 1.549646                | -0.894689 | -0.092496 |
| 6                                            | 8                | 0              | -2.537819               | -1.465211 | -0.263291 |
| 7                                            | 8                | 0              | 0.000000                | 0.000000  | 3.118481  |
| 8                                            | 8                | 0              | 0.000000                | 2.930421  | -0.263291 |
| 9                                            | 8                | 0              | 0.000000                | 0.000000  | -2.988829 |
| 10                                           | 8                | 0              | 2.537819                | -1.465211 | -0.263291 |
| 11                                           | 5                | 0              | 0.000000                | 0.000000  | -1.770718 |
| Sum of electronic and zero-point Energies=   |                  |                | -1936.279462            |           |           |
| Sum of electronic and thermal Free Energies= |                  |                | -1936.318753            |           |           |

**Table S7.** The theoretical Cartesian coordinates (in Å) for the structure **BN1-I** using the M06L/DZP method

Standard orientation:

| Center<br>Number                             | Atomic<br>Number | Atomic<br>Type | Coordinates (Angstroms) |           |           |
|----------------------------------------------|------------------|----------------|-------------------------|-----------|-----------|
|                                              |                  |                | X                       | Y         | Z         |
| 1                                            | 27               | 0              | 0.000000                | 0.000000  | 1.717281  |
| 2                                            | 6                | 0              | 0.000000                | 0.000000  | 3.532543  |
| 3                                            | 6                | 0              | 1.540242                | -0.889259 | 1.434067  |
| 4                                            | 6                | 0              | 0.000000                | 1.778518  | 1.434067  |
| 5                                            | 6                | 0              | -1.540242               | -0.889259 | 1.434067  |
| 6                                            | 8                | 0              | 0.000000                | 2.914703  | 1.222114  |
| 7                                            | 8                | 0              | 0.000000                | 0.000000  | 4.685286  |
| 8                                            | 8                | 0              | 2.524207                | -1.457352 | 1.222114  |
| 9                                            | 8                | 0              | -2.524207               | -1.457352 | 1.222114  |
| 10                                           | 5                | 0              | 0.000000                | 0.000000  | -0.213007 |
| 11                                           | 7                | 0              | 0.000000                | 0.000000  | -1.476840 |
| 12                                           | 14               | 0              | 0.000000                | 0.000000  | -3.200905 |
| 13                                           | 6                | 0              | 1.531833                | 0.884404  | -3.807040 |
| 14                                           | 1                | 0              | 2.444595                | 0.391827  | -3.456810 |
| 15                                           | 1                | 0              | 1.571064                | 0.907054  | -4.901639 |
| 16                                           | 1                | 0              | 1.561630                | 1.921168  | -3.456810 |
| 17                                           | 6                | 0              | -1.531833               | 0.884404  | -3.807040 |
| 18                                           | 1                | 0              | -1.571064               | 0.907054  | -4.901639 |
| 19                                           | 1                | 0              | -2.444595               | 0.391827  | -3.456810 |
| 20                                           | 1                | 0              | -1.561630               | 1.921168  | -3.456810 |
| 21                                           | 6                | 0              | 0.000000                | -1.768808 | -3.807040 |
| 22                                           | 1                | 0              | 0.000000                | -1.814108 | -4.901639 |
| 23                                           | 1                | 0              | 0.882965                | -2.312995 | -3.456810 |
| 24                                           | 1                | 0              | -0.882965               | -2.312995 | -3.456810 |
| Sum of electronic and zero-point Energies=   |                  |                | -1955.632736            |           |           |
| Sum of electronic and thermal Free Energies= |                  |                | -1955.676345            |           |           |

**Table S8.** The theoretical Cartesian coordinates (in Å) for the structure **SiO2-I** using the M06L/DZP method

Standard orientation:

| Center<br>Number                             | Atomic<br>Number | Atomic<br>Type | Coordinates (Angstroms) |           |           |
|----------------------------------------------|------------------|----------------|-------------------------|-----------|-----------|
|                                              |                  |                | X                       | Y         | Z         |
| 1                                            | 26               | 0              | 3.339134                | 0.000000  | 0.000000  |
| 2                                            | 26               | 0              | -3.339134               | 0.000000  | 0.000000  |
| 3                                            | 6                | 0              | -3.167682               | 1.797963  | 0.000000  |
| 4                                            | 6                | 0              | -3.167682               | -1.797963 | 0.000000  |
| 5                                            | 6                | 0              | -4.330619               | 0.000000  | 1.512942  |
| 6                                            | 6                | 0              | -4.330619               | 0.000000  | -1.512942 |
| 7                                            | 6                | 0              | 4.330619                | 0.000000  | 1.512942  |
| 8                                            | 6                | 0              | 3.167682                | 1.797963  | 0.000000  |
| 9                                            | 6                | 0              | 4.330619                | 0.000000  | -1.512942 |
| 10                                           | 6                | 0              | 3.167682                | -1.797963 | 0.000000  |
| 11                                           | 8                | 0              | -3.050733               | 2.949651  | 0.000000  |
| 12                                           | 8                | 0              | -4.960701               | 0.000000  | -2.484358 |
| 13                                           | 8                | 0              | -4.960701               | 0.000000  | 2.484358  |
| 14                                           | 8                | 0              | -3.050733               | -2.949651 | 0.000000  |
| 15                                           | 8                | 0              | 4.960701                | 0.000000  | 2.484358  |
| 16                                           | 8                | 0              | 3.050733                | 2.949651  | 0.000000  |
| 17                                           | 8                | 0              | 4.960701                | 0.000000  | -2.484358 |
| 18                                           | 8                | 0              | 3.050733                | -2.949651 | 0.000000  |
| 19                                           | 14               | 0              | -1.212371               | 0.000000  | 0.000000  |
| 20                                           | 14               | 0              | 1.212371                | 0.000000  | 0.000000  |
| 21                                           | 8                | 0              | 0.000000                | 1.174938  | 0.000000  |
| 22                                           | 8                | 0              | 0.000000                | -1.174938 | 0.000000  |
| Sum of electronic and zero-point Energies=   |                  |                | -4163.778126            |           |           |
| Sum of electronic and thermal Free Energies= |                  |                | -4163.837996            |           |           |

**Table S9.** The theoretical Cartesian coordinates (in Å) for the structure **BO2-I** using the M06L/DZP method

Standard orientation:

| Center<br>Number                             | Atomic<br>Number | Atomic<br>Type | Coordinates (Angstroms) |           |           |
|----------------------------------------------|------------------|----------------|-------------------------|-----------|-----------|
|                                              |                  |                | X                       | Y         | Z         |
| 1                                            | 8                | 0              | 1.077333                | 0.000000  | -0.220426 |
| 2                                            | 8                | 0              | -1.077333               | 0.000000  | -0.220426 |
| 3                                            | 5                | 0              | 0.000000                | 0.906373  | -0.192416 |
| 4                                            | 5                | 0              | 0.000000                | -0.906373 | -0.192416 |
| 5                                            | 27               | 0              | 0.000000                | -2.866711 | -0.009959 |
| 6                                            | 27               | 0              | 0.000000                | 2.866711  | -0.009959 |
| 7                                            | 6                | 0              | 0.000000                | 2.283118  | 1.675066  |
| 8                                            | 6                | 0              | 0.000000                | 4.665630  | 0.299313  |
| 9                                            | 6                | 0              | -1.557436               | 2.786311  | -0.922095 |
| 10                                           | 6                | 0              | 1.557436                | 2.786311  | -0.922095 |
| 11                                           | 6                | 0              | 0.000000                | -2.283118 | 1.675066  |
| 12                                           | 6                | 0              | -1.557436               | -2.786311 | -0.922095 |
| 13                                           | 6                | 0              | 1.557436                | -2.786311 | -0.922095 |
| 14                                           | 6                | 0              | 0.000000                | -4.665630 | 0.299313  |
| 15                                           | 8                | 0              | 0.000000                | -1.878173 | 2.760831  |
| 16                                           | 8                | 0              | 2.560023                | -2.729435 | -1.492274 |
| 17                                           | 8                | 0              | 0.000000                | -5.800820 | 0.500374  |
| 18                                           | 8                | 0              | -2.560023               | -2.729435 | -1.492274 |
| 19                                           | 8                | 0              | -2.560023               | 2.729435  | -1.492274 |
| 20                                           | 8                | 0              | 2.560023                | 2.729435  | -1.492274 |
| 21                                           | 8                | 0              | 0.000000                | 1.878173  | 2.760831  |
| 22                                           | 8                | 0              | 0.000000                | 5.800820  | 0.500374  |
| Sum of electronic and zero-point Energies=   |                  |                | -3872.612025            |           |           |
| Sum of electronic and thermal Free Energies= |                  |                | -3872.670691            |           |           |

**Table S10.** The theoretical Cartesian coordinates (in Å) for the structure **BN2-I** using the M06L/DZP method

Standard orientation:

| Center<br>Number | Atomic<br>Number | Atomic<br>Type | Coordinates (Angstroms) |           |           |
|------------------|------------------|----------------|-------------------------|-----------|-----------|
|                  |                  |                | X                       | Y         | Z         |
| 1                | 5                | 0              | 0.000000                | 0.923734  | -0.059906 |
| 2                | 27               | 0              | 0.000000                | 2.973800  | -0.187939 |
| 3                | 27               | 0              | 0.000000                | -2.973800 | -0.187939 |
| 4                | 6                | 0              | 0.000000                | -2.498471 | 1.517425  |
| 5                | 6                | 0              | 1.479621                | -2.832259 | -1.209866 |
| 6                | 6                | 0              | -1.479621               | -2.832259 | -1.209866 |
| 7                | 6                | 0              | 0.000000                | 2.498471  | 1.517425  |
| 8                | 6                | 0              | 1.479621                | 2.832259  | -1.209866 |
| 9                | 6                | 0              | -1.479621               | 2.832259  | -1.209866 |
| 10               | 6                | 0              | 0.000000                | 4.779481  | 0.038432  |
| 11               | 8                | 0              | 0.000000                | 2.192438  | 2.640528  |
| 12               | 8                | 0              | -2.415264               | 2.741517  | -1.886570 |
| 13               | 8                | 0              | 0.000000                | 5.922406  | 0.203725  |
| 14               | 8                | 0              | 2.415264                | 2.741517  | -1.886570 |
| 15               | 8                | 0              | 2.415264                | -2.741517 | -1.886570 |
| 16               | 8                | 0              | -2.415264               | -2.741517 | -1.886570 |
| 17               | 8                | 0              | 0.000000                | -2.192438 | 2.640528  |
| 18               | 8                | 0              | 0.000000                | -5.922406 | 0.203725  |
| 19               | 7                | 0              | 1.119755                | 0.000000  | -0.027698 |
| 20               | 7                | 0              | -1.119755               | 0.000000  | -0.027698 |
| 21               | 5                | 0              | 0.000000                | -0.923734 | -0.059906 |
| 22               | 14               | 0              | 2.848819                | 0.000000  | 0.324022  |
| 23               | 14               | 0              | -2.848819               | 0.000000  | 0.324022  |
| 24               | 6                | 0              | -3.252948               | 1.501946  | 1.364012  |
| 25               | 1                | 0              | -2.689822               | 1.505325  | 2.303450  |
| 26               | 1                | 0              | -3.070276               | 2.458055  | 0.864323  |
| 27               | 1                | 0              | -4.317473               | 1.476472  | 1.626086  |
| 28               | 6                | 0              | -3.252948               | -1.501946 | 1.364012  |
| 29               | 1                | 0              | -3.070276               | -2.458055 | 0.864323  |
| 30               | 1                | 0              | -2.689822               | -1.505325 | 2.303450  |
| 31               | 1                | 0              | -4.317473               | -1.476472 | 1.626086  |
| 32               | 6                | 0              | -3.863392               | 0.000000  | -1.255227 |
| 33               | 1                | 0              | -4.506688               | -0.884026 | -1.314025 |
| 34               | 1                | 0              | -4.506688               | 0.884026  | -1.314025 |
| 35               | 1                | 0              | -3.235036               | 0.000000  | -2.150648 |
| 36               | 6                | 0              | 3.863392                | 0.000000  | -1.255227 |
| 37               | 1                | 0              | 4.506688                | 0.884026  | -1.314025 |

|    |   |   |          |           |           |
|----|---|---|----------|-----------|-----------|
| 38 | 1 | 0 | 4.506688 | -0.884026 | -1.314025 |
| 39 | 1 | 0 | 3.235036 | 0.000000  | -2.150648 |
| 40 | 6 | 0 | 3.252948 | -1.501946 | 1.364012  |
| 41 | 1 | 0 | 3.070276 | -2.458055 | 0.864323  |
| 42 | 1 | 0 | 4.317473 | -1.476472 | 1.626086  |
| 43 | 1 | 0 | 2.689822 | -1.505325 | 2.303450  |
| 44 | 6 | 0 | 3.252948 | 1.501946  | 1.364012  |
| 45 | 1 | 0 | 3.070276 | 2.458055  | 0.864323  |
| 46 | 1 | 0 | 2.689822 | 1.505325  | 2.303450  |
| 47 | 1 | 0 | 4.317473 | 1.476472  | 1.626086  |
| 48 | 6 | 0 | 0.000000 | -4.779481 | 0.038432  |

-----  
Sum of electronic and zero-point Energies= -4649.974668

Sum of electronic and thermal Free Energies= -4650.046306

**Table S11.** The theoretical Cartesian coordinates (in Å) for the structure **SiO3-I** using the M06L/DZP method

Standard orientation:

| Center<br>Number                             | Atomic<br>Number | Atomic<br>Type | Coordinates (Angstroms) |           |           |
|----------------------------------------------|------------------|----------------|-------------------------|-----------|-----------|
|                                              |                  |                | X                       | Y         | Z         |
| 1                                            | 8                | 0              | 0.000000                | 1.501845  | 0.000000  |
| 2                                            | 8                | 0              | -1.300636               | -0.750922 | 0.000000  |
| 3                                            | 8                | 0              | 1.300636                | -0.750922 | 0.000000  |
| 4                                            | 14               | 0              | 1.542345                | 0.890473  | 0.000000  |
| 5                                            | 14               | 0              | -1.542345               | 0.890473  | 0.000000  |
| 6                                            | 14               | 0              | 0.000000                | -1.780947 | 0.000000  |
| 7                                            | 26               | 0              | 3.394666                | 1.959911  | 0.000000  |
| 8                                            | 26               | 0              | 0.000000                | -3.919823 | 0.000000  |
| 9                                            | 26               | 0              | -3.394666               | 1.959911  | 0.000000  |
| 10                                           | 6                | 0              | 2.352729                | 3.434506  | 0.000000  |
| 11                                           | 6                | 0              | 4.255492                | 2.456910  | 1.509448  |
| 12                                           | 6                | 0              | 4.150734                | 0.320270  | 0.000000  |
| 13                                           | 6                | 0              | 4.255492                | 2.456910  | -1.509448 |
| 14                                           | 6                | 0              | 1.798005                | -3.754776 | 0.000000  |
| 15                                           | 6                | 0              | 0.000000                | -4.913819 | 1.509448  |
| 16                                           | 6                | 0              | -1.798005               | -3.754776 | 0.000000  |
| 17                                           | 6                | 0              | 0.000000                | -4.913819 | -1.509448 |
| 18                                           | 6                | 0              | -4.150734               | 0.320270  | 0.000000  |
| 19                                           | 6                | 0              | -4.255492               | 2.456910  | 1.509448  |
| 20                                           | 6                | 0              | -2.352729               | 3.434506  | 0.000000  |
| 21                                           | 6                | 0              | -4.255492               | 2.456910  | -1.509448 |
| 22                                           | 8                | 0              | 4.804495                | 2.773876  | 2.479032  |
| 23                                           | 8                | 0              | 1.680522                | 4.376991  | 0.000000  |
| 24                                           | 8                | 0              | 4.804495                | 2.773876  | -2.479032 |
| 25                                           | 8                | 0              | 2.950324                | -3.643870 | 0.000000  |
| 26                                           | 8                | 0              | 0.000000                | -5.547753 | -2.479032 |
| 27                                           | 8                | 0              | 0.000000                | -5.547753 | 2.479032  |
| 28                                           | 8                | 0              | -2.950324               | -3.643870 | 0.000000  |
| 29                                           | 8                | 0              | 4.630846                | -0.733121 | 0.000000  |
| 30                                           | 8                | 0              | -4.630846               | -0.733121 | 0.000000  |
| 31                                           | 8                | 0              | -1.680522               | 4.376991  | 0.000000  |
| 32                                           | 8                | 0              | -4.804495               | 2.773876  | -2.479032 |
| 33                                           | 8                | 0              | -4.804495               | 2.773876  | 2.479032  |
| Sum of electronic and zero-point Energies=   |                  |                | -6245.684092            |           |           |
| Sum of electronic and thermal Free Energies= |                  |                | -6245.761151            |           |           |



**Table S12.** The theoretical Cartesian coordinates (in Å) for the structure **BO3-I** using the M06L/DZP method

Input orientation:

| Center<br>Number                             | Atomic<br>Number | Atomic<br>Type | Coordinates (Angstroms) |           |           |
|----------------------------------------------|------------------|----------------|-------------------------|-----------|-----------|
|                                              |                  |                | X                       | Y         | Z         |
| 1                                            | 8                | 0              | 0.806190                | 1.097505  | -0.031655 |
| 2                                            | 8                | 0              | 0.550409                | -1.255020 | -0.067023 |
| 3                                            | 8                | 0              | -1.359288               | 0.142849  | -0.060627 |
| 4                                            | 6                | 0              | -2.971495               | 2.334588  | -0.263230 |
| 5                                            | 6                | 0              | -1.971211               | 4.814084  | 0.294888  |
| 6                                            | 6                | 0              | -0.644370               | 2.876032  | 1.697887  |
| 7                                            | 6                | 0              | -0.263529               | 3.399893  | -1.300471 |
| 8                                            | 6                | 0              | -3.166382               | -1.791261 | 0.813245  |
| 9                                            | 6                | 0              | -3.091033               | -4.180812 | -0.498379 |
| 10                                           | 6                | 0              | -1.728105               | -2.247091 | -1.868841 |
| 11                                           | 6                | 0              | -0.684720               | -3.630594 | 0.674147  |
| 12                                           | 6                | 0              | 2.844024                | -0.097865 | 1.744808  |
| 13                                           | 6                | 0              | 3.119784                | -2.028585 | -0.633081 |
| 14                                           | 6                | 0              | 3.406916                | 1.030174  | -1.050830 |
| 15                                           | 6                | 0              | 5.170401                | -0.516218 | 0.353720  |
| 16                                           | 8                | 0              | -2.340964               | 5.897694  | 0.433533  |
| 17                                           | 8                | 0              | -3.983827               | 1.825339  | -0.485677 |
| 18                                           | 8                | 0              | 0.464070                | 3.568594  | -2.184384 |
| 19                                           | 8                | 0              | -3.900077               | -1.159573 | 1.444442  |
| 20                                           | 8                | 0              | 0.174471                | -4.181163 | 1.216351  |
| 21                                           | 8                | 0              | -3.779719               | -5.082791 | -0.703663 |
| 22                                           | 8                | 0              | -1.540297               | -1.907693 | -2.963589 |
| 23                                           | 8                | 0              | -0.150227               | 2.707313  | 2.733786  |
| 24                                           | 8                | 0              | 2.475925                | 0.095600  | 2.828721  |
| 25                                           | 8                | 0              | 3.397894                | 1.945702  | -1.756821 |
| 26                                           | 8                | 0              | 6.305198                | -0.598657 | 0.542337  |
| 27                                           | 8                | 0              | 2.929732                | -3.080530 | -1.071082 |
| 28                                           | 5                | 0              | 1.381530                | -0.154929 | -0.034159 |
| 29                                           | 5                | 0              | -0.562726               | 1.267919  | -0.023991 |
| 30                                           | 5                | 0              | -0.821166               | -1.126953 | -0.085800 |
| 31                                           | 27               | 0              | 3.374216                | -0.378498 | 0.073121  |
| 32                                           | 27               | 0              | -1.365891               | 3.106863  | 0.085829  |
| 33                                           | 27               | 0              | -2.007556               | -2.747397 | -0.190960 |
| Sum of electronic and zero-point Energies=   |                  |                | -5808.984902            |           |           |
| Sum of electronic and thermal Free Energies= |                  |                | -5809.061435            |           |           |

**Table S13.** The theoretical Cartesian coordinates (in Å) for the structure **BN3-I** using the M06L/DZP method

Input orientation:

| Center<br>Number | Atomic<br>Number | Atomic<br>Type | Coordinates (Angstroms) |           |           |
|------------------|------------------|----------------|-------------------------|-----------|-----------|
|                  |                  |                | X                       | Y         | Z         |
| 1                | 27               | 0              | 1.582093                | 2.949805  | 0.451358  |
| 2                | 27               | 0              | 1.759422                | -2.837487 | 0.474215  |
| 3                | 27               | 0              | -3.343173               | -0.099662 | 0.459316  |
| 4                | 6                | 0              | 1.392529                | 1.875615  | 1.893767  |
| 5                | 6                | 0              | 3.283188                | 3.481756  | 0.677174  |
| 6                | 6                | 0              | 1.478296                | 2.832705  | -1.296037 |
| 7                | 6                | 0              | 0.684095                | 4.449615  | 0.928624  |
| 8                | 6                | 0              | 0.921388                | -2.160559 | 1.930845  |
| 9                | 6                | 0              | 1.381923                | -4.579269 | 0.686329  |
| 10               | 6                | 0              | 1.708826                | -2.686895 | -1.272987 |
| 11               | 6                | 0              | 3.506491                | -2.806204 | 0.952969  |
| 12               | 6                | 0              | -2.318225               | 0.286307  | 1.900630  |
| 13               | 6                | 0              | -4.666228               | 1.093504  | 0.682711  |
| 14               | 6                | 0              | -3.196479               | -0.129793 | -1.288485 |
| 15               | 6                | 0              | -4.185564               | -1.627243 | 0.951149  |
| 16               | 8                | 0              | 4.361064                | 3.880249  | 0.829028  |
| 17               | 8                | 0              | 1.291462                | 1.156328  | 2.795200  |
| 18               | 8                | 0              | 0.242897                | 5.471745  | 1.249982  |
| 19               | 8                | 0              | 0.351765                | -1.740265 | 2.846642  |
| 20               | 8                | 0              | 4.609788                | -2.945206 | 1.278962  |
| 21               | 8                | 0              | 1.197458                | -5.714515 | 0.831309  |
| 22               | 8                | 0              | 1.790343                | -2.789255 | -2.444512 |
| 23               | 8                | 0              | 1.520372                | 2.944887  | -2.467954 |
| 24               | 8                | 0              | -1.648274               | 0.565425  | 2.802707  |
| 25               | 8                | 0              | -3.323973               | -0.149931 | -2.459583 |
| 26               | 8                | 0              | -4.851188               | -2.513469 | 1.289467  |
| 27               | 8                | 0              | -5.558729               | 1.817462  | 0.833862  |
| 28               | 7                | 0              | -0.794316               | 1.248472  | -0.724670 |
| 29               | 7                | 0              | 1.474577                | 0.066365  | -0.720640 |
| 30               | 7                | 0              | -0.684481               | -1.308928 | -0.724042 |
| 31               | 5                | 0              | 0.755632                | -1.185834 | -0.625679 |
| 32               | 5                | 0              | -1.410222               | -0.060457 | -0.629343 |
| 33               | 5                | 0              | 0.649272                | 1.252956  | -0.626557 |
| 34               | 14               | 0              | -1.798844               | 2.814331  | -0.809672 |
| 35               | 14               | 0              | -1.533805               | -2.963361 | -0.810388 |
| 36               | 14               | 0              | 3.331734                | 0.148904  | -0.812869 |
| 37               | 6                | 0              | -1.822459               | -3.619452 | 0.921407  |

|    |   |   |           |           |           |
|----|---|---|-----------|-----------|-----------|
| 38 | 1 | 0 | -1.049395 | -4.328846 | 1.225961  |
| 39 | 1 | 0 | -1.866708 | -2.836055 | 1.684287  |
| 40 | 1 | 0 | -2.778791 | -4.153228 | 0.950420  |
| 41 | 6 | 0 | -0.660465 | -4.251260 | -1.866770 |
| 42 | 1 | 0 | 0.269043  | -4.696825 | -1.519533 |
| 43 | 1 | 0 | -1.393538 | -5.065644 | -1.929743 |
| 44 | 1 | 0 | -0.500454 | -3.895164 | -2.889063 |
| 45 | 6 | 0 | -3.145303 | -2.973105 | -1.780200 |
| 46 | 1 | 0 | -3.411337 | -4.037643 | -1.806723 |
| 47 | 1 | 0 | -4.014012 | -2.445896 | -1.392483 |
| 48 | 1 | 0 | -2.997120 | -2.658961 | -2.817740 |
| 49 | 6 | 0 | 4.051649  | 0.214828  | 0.916564  |
| 50 | 1 | 0 | 4.326571  | 1.229789  | 1.212323  |
| 51 | 1 | 0 | 3.377004  | -0.183309 | 1.681117  |
| 52 | 1 | 0 | 4.966500  | -0.386487 | 0.950173  |
| 53 | 6 | 0 | 4.140331  | -1.243866 | -1.787049 |
| 54 | 1 | 0 | 5.198316  | -0.951213 | -1.799816 |
| 55 | 1 | 0 | 4.103563  | -2.265354 | -1.414012 |
| 56 | 1 | 0 | 3.804427  | -1.256387 | -2.828278 |
| 57 | 6 | 0 | 4.007463  | 1.547318  | -1.871928 |
| 58 | 1 | 0 | 3.927860  | 2.573115  | -1.520018 |
| 59 | 1 | 0 | 5.078724  | 1.319804  | -1.941858 |
| 60 | 1 | 0 | 3.610873  | 1.510007  | -2.891127 |
| 61 | 6 | 0 | -0.996720 | 4.222000  | -1.769796 |
| 62 | 1 | 0 | -1.779811 | 4.991708  | -1.771175 |
| 63 | 1 | 0 | -0.094353 | 4.699340  | -1.393536 |
| 64 | 1 | 0 | -0.822862 | 3.949554  | -2.815140 |
| 65 | 6 | 0 | -2.224924 | 3.391921  | 0.922032  |
| 66 | 1 | 0 | -3.212456 | 3.053109  | 1.243539  |
| 67 | 1 | 0 | -1.502738 | 3.064464  | 1.676353  |
| 68 | 1 | 0 | -2.238159 | 4.487273  | 0.941429  |
| 69 | 6 | 0 | -3.340122 | 2.704974  | -1.879303 |
| 70 | 1 | 0 | -4.198892 | 2.140115  | -1.525738 |
| 71 | 1 | 0 | -3.665764 | 3.749002  | -1.967618 |
| 72 | 1 | 0 | -3.107307 | 2.362061  | -2.891976 |

-----  
Sum of electronic and zero-point Energies= -6974.938308

Sum of electronic and thermal Free Energies= -6975.024880

**Table S14.** The theoretical Cartesian coordinates (in Å) for the structure **SiO4-I** using the M06L/DZP method

Standard orientation:

| Center<br>Number | Atomic<br>Number | Atomic<br>Type | Coordinates (Angstroms) |           |           |
|------------------|------------------|----------------|-------------------------|-----------|-----------|
|                  |                  |                | X                       | Y         | Z         |
| 1                | 8                | 0              | 1.299869                | 1.299869  | 0.000000  |
| 2                | 8                | 0              | 1.299869                | -1.299869 | 0.000000  |
| 3                | 8                | 0              | -1.299869               | -1.299869 | 0.000000  |
| 4                | 8                | 0              | -1.299869               | 1.299869  | 0.000000  |
| 5                | 14               | 0              | 2.148230                | 0.000000  | 0.538561  |
| 6                | 14               | 0              | 0.000000                | -2.148230 | -0.538561 |
| 7                | 14               | 0              | 0.000000                | 2.148230  | -0.538561 |
| 8                | 14               | 0              | -2.148230               | 0.000000  | 0.538561  |
| 9                | 26               | 0              | 0.000000                | -3.941056 | -1.713882 |
| 10               | 26               | 0              | 0.000000                | 3.941056  | -1.713882 |
| 11               | 26               | 0              | -3.941056               | 0.000000  | 1.713882  |
| 12               | 26               | 0              | 3.941056                | 0.000000  | 1.713882  |
| 13               | 6                | 0              | 1.796096                | 3.782531  | -1.630863 |
| 14               | 6                | 0              | 0.000000                | 3.942347  | -3.520732 |
| 15               | 6                | 0              | -1.796096               | 3.782531  | -1.630863 |
| 16               | 6                | 0              | 0.000000                | 5.603986  | -0.998306 |
| 17               | 6                | 0              | -3.942347               | 0.000000  | 3.520732  |
| 18               | 6                | 0              | -3.782531               | 1.796096  | 1.630863  |
| 19               | 6                | 0              | -5.603986               | 0.000000  | 0.998306  |
| 20               | 6                | 0              | -3.782531               | -1.796096 | 1.630863  |
| 21               | 6                | 0              | -1.796096               | -3.782531 | -1.630863 |
| 22               | 6                | 0              | 0.000000                | -3.942347 | -3.520732 |
| 23               | 6                | 0              | 0.000000                | -5.603986 | -0.998306 |
| 24               | 6                | 0              | 1.796096                | -3.782531 | -1.630863 |
| 25               | 6                | 0              | 3.782531                | -1.796096 | 1.630863  |
| 26               | 6                | 0              | 3.942347                | 0.000000  | 3.520732  |
| 27               | 6                | 0              | 5.603986                | 0.000000  | 0.998306  |
| 28               | 6                | 0              | 3.782531                | 1.796096  | 1.630863  |
| 29               | 8                | 0              | 3.656117                | -2.946599 | 1.581099  |
| 30               | 8                | 0              | 6.666551                | 0.000000  | 0.538688  |
| 31               | 8                | 0              | 3.935079                | 0.000000  | 4.679241  |
| 32               | 8                | 0              | 3.656117                | 2.946599  | 1.581099  |
| 33               | 8                | 0              | 2.946599                | 3.656117  | -1.581099 |
| 34               | 8                | 0              | 0.000000                | 3.935079  | -4.679241 |
| 35               | 8                | 0              | -2.946599               | 3.656117  | -1.581099 |
| 36               | 8                | 0              | 0.000000                | 6.666551  | -0.538688 |
| 37               | 8                | 0              | 2.946599                | -3.656117 | -1.581099 |

|                                              |   |   |           |              |           |
|----------------------------------------------|---|---|-----------|--------------|-----------|
| 38                                           | 8 | 0 | 0.000000  | -6.666551    | -0.538688 |
| 39                                           | 8 | 0 | 0.000000  | -3.935079    | -4.679241 |
| 40                                           | 8 | 0 | -2.946599 | -3.656117    | -1.581099 |
| 41                                           | 8 | 0 | -3.656117 | -2.946599    | 1.581099  |
| 42                                           | 8 | 0 | -3.935079 | 0.000000     | 4.679241  |
| 43                                           | 8 | 0 | -6.666551 | 0.000000     | 0.538688  |
| 44                                           | 8 | 0 | -3.656117 | 2.946599     | 1.581099  |
| -----                                        |   |   |           |              |           |
| Sum of electronic and zero-point Energies=   |   |   |           | -8327.640941 |           |
| Sum of electronic and thermal Free Energies= |   |   |           | -8327.733733 |           |

**Table S15.** The theoretical Cartesian coordinates (in Å) for the structure **BO4-I** using the M06L/DZP method

Input orientation:

| Center<br>Number | Atomic<br>Number | Atomic<br>Type | Coordinates (Angstroms) |           |           |
|------------------|------------------|----------------|-------------------------|-----------|-----------|
|                  |                  |                | X                       | Y         | Z         |
| 1                | 8                | 0              | -1.187788               | 1.185616  | -0.279943 |
| 2                | 8                | 0              | -1.187788               | -1.185616 | -0.279943 |
| 3                | 8                | 0              | 1.187788                | -1.185616 | -0.279943 |
| 4                | 8                | 0              | 1.187788                | 1.185616  | -0.279943 |
| 5                | 6                | 0              | -1.529109               | 2.362195  | 2.233964  |
| 6                | 6                | 0              | 0.000000                | 4.594670  | 2.667671  |
| 7                | 6                | 0              | 1.529109                | 2.362195  | 2.233964  |
| 8                | 6                | 0              | 0.000000                | 3.897825  | 0.032343  |
| 9                | 6                | 0              | 5.040858                | 0.000000  | -2.639832 |
| 10               | 6                | 0              | 3.883672                | -1.550740 | -0.719873 |
| 11               | 6                | 0              | 2.325609                | 0.000000  | -2.867792 |
| 12               | 6                | 0              | 3.883672                | 1.550740  | -0.719873 |
| 13               | 6                | 0              | -1.529109               | -2.362195 | 2.233964  |
| 14               | 6                | 0              | 0.000000                | -3.897825 | 0.032343  |
| 15               | 6                | 0              | 0.000000                | -4.594670 | 2.667671  |
| 16               | 6                | 0              | 1.529109                | -2.362195 | 2.233964  |
| 17               | 6                | 0              | -3.883672               | 1.550740  | -0.719873 |
| 18               | 6                | 0              | -5.040858               | 0.000000  | -2.639832 |
| 19               | 6                | 0              | -2.325609               | 0.000000  | -2.867792 |
| 20               | 6                | 0              | -3.883672               | -1.550740 | -0.719873 |
| 21               | 8                | 0              | -4.066615               | 2.555462  | -0.177908 |
| 22               | 8                | 0              | -1.521044               | 0.000000  | -3.704617 |
| 23               | 8                | 0              | -5.975186               | 0.000000  | -3.316400 |
| 24               | 8                | 0              | -4.066615               | -2.555462 | -0.177908 |
| 25               | 8                | 0              | -2.502987               | 1.857497  | 2.600337  |
| 26               | 8                | 0              | 0.000000                | 5.546486  | 3.318779  |
| 27               | 8                | 0              | 2.502987                | 1.857497  | 2.600337  |
| 28               | 8                | 0              | 0.000000                | 4.419489  | -1.005257 |
| 29               | 8                | 0              | 2.502987                | -1.857497 | 2.600337  |
| 30               | 8                | 0              | 0.000000                | -5.546486 | 3.318779  |
| 31               | 8                | 0              | 0.000000                | -4.419489 | -1.005257 |
| 32               | 8                | 0              | -2.502987               | -1.857497 | 2.600337  |
| 33               | 8                | 0              | 4.066615                | 2.555462  | -0.177908 |
| 34               | 8                | 0              | 5.975186                | 0.000000  | -3.316400 |
| 35               | 8                | 0              | 1.521044                | 0.000000  | -3.704617 |
| 36               | 8                | 0              | 4.066615                | -2.555462 | -0.177908 |
| 37               | 5                | 0              | 1.769150                | 0.000000  | -0.627761 |

|    |    |   |           |           |           |
|----|----|---|-----------|-----------|-----------|
| 38 | 5  | 0 | 0.000000  | 1.645052  | 0.212153  |
| 39 | 5  | 0 | 0.000000  | -1.645052 | 0.212153  |
| 40 | 5  | 0 | -1.769150 | 0.000000  | -0.627761 |
| 41 | 27 | 0 | 3.552427  | 0.000000  | -1.589930 |
| 42 | 27 | 0 | 0.000000  | 3.104431  | 1.617153  |
| 43 | 27 | 0 | -3.552427 | 0.000000  | -1.589930 |
| 44 | 27 | 0 | 0.000000  | -3.104431 | 1.617153  |

-----  
Sum of electronic and zero-point Energies= -7745.303379

Sum of electronic and thermal Free Energies= -7745.398613

**Table S16.** The theoretical Cartesian coordinates (in Å) for the structure **SiO5-I** using the M06L/DZP method

Standard orientation:

| Center<br>Number | Atomic<br>Number | Atomic<br>Type | Coordinates (Angstroms) |           |           |
|------------------|------------------|----------------|-------------------------|-----------|-----------|
|                  |                  |                | X                       | Y         | Z         |
| 1                | 8                | 0              | 1.638196                | -0.091474 | 0.002256  |
| 2                | 8                | 0              | 0.764493                | 2.178901  | 0.846429  |
| 3                | 8                | 0              | -1.599282               | 1.389591  | 0.141742  |
| 4                | 8                | 0              | -1.582107               | -1.156311 | -0.125703 |
| 5                | 8                | 0              | 0.617097                | -2.290808 | -0.860605 |
| 6                | 14               | 0              | -0.786546               | -2.586011 | -0.051546 |
| 7                | 14               | 0              | -2.612508               | 0.114299  | -0.014952 |
| 8                | 14               | 0              | 1.955323                | 1.083474  | 1.109033  |
| 9                | 14               | 0              | 1.888692                | -1.282731 | -1.105738 |
| 10               | 14               | 0              | -0.597006               | 2.681195  | 0.076530  |
| 11               | 26               | 0              | -4.755993               | 0.131254  | -0.088212 |
| 12               | 26               | 0              | -1.369016               | -4.441571 | 0.855833  |
| 13               | 26               | 0              | 3.512395                | -1.532779 | -2.485146 |
| 14               | 26               | 0              | 3.569967                | 1.233977  | 2.511857  |
| 15               | 26               | 0              | -0.959605               | 4.609793  | -0.791419 |
| 16               | 6                | 0              | 2.728175                | 2.739152  | 3.053069  |
| 17               | 6                | 0              | 5.071993                | 2.113305  | 2.022111  |
| 18               | 6                | 0              | 3.613800                | 0.561244  | 4.192002  |
| 19               | 6                | 0              | 4.113686                | -0.305673 | 1.765856  |
| 20               | 6                | 0              | 4.940993                | -2.519540 | -1.981228 |
| 21               | 6                | 0              | 4.155808                | -0.043139 | -1.716688 |
| 22               | 6                | 0              | 3.620351                | -0.844545 | -4.155806 |
| 23               | 6                | 0              | 0.615117                | 5.050944  | -0.023444 |
| 24               | 6                | 0              | -2.402837               | 3.810430  | -1.509769 |
| 25               | 6                | 0              | -1.924015               | 5.836713  | 0.126515  |
| 26               | 6                | 0              | -0.408310               | 5.201760  | -2.407672 |
| 27               | 6                | 0              | -4.602439               | 1.812218  | 0.545101  |
| 28               | 6                | 0              | -5.807299               | -0.384920 | 1.291861  |
| 29               | 6                | 0              | -4.576344               | -1.563052 | -0.669965 |
| 30               | 6                | 0              | -5.634565               | 0.682228  | -1.571374 |
| 31               | 6                | 0              | -2.467559               | -5.563101 | -0.045991 |
| 32               | 6                | 0              | -2.715880               | -3.483278 | 1.563363  |
| 33               | 6                | 0              | -0.880257               | -5.066097 | 2.480066  |
| 34               | 6                | 0              | 0.142058                | -5.076244 | 0.096268  |
| 35               | 6                | 0              | 2.586281                | -2.972451 | -3.065726 |
| 36               | 8                | 0              | -3.314999               | 3.267372  | -1.978641 |
| 37               | 8                | 0              | -0.052061               | 5.577371  | -3.444047 |



|    |   |   |           |           |           |
|----|---|---|-----------|-----------|-----------|
| 38 | 8 | 0 | -2.553081 | 6.609259  | 0.715964  |
| 39 | 8 | 0 | 1.631824  | 5.312829  | 0.466024  |
| 40 | 8 | 0 | 4.544680  | 0.912912  | -1.183110 |
| 41 | 8 | 0 | 3.685958  | -0.401394 | -5.224011 |
| 42 | 8 | 0 | 5.850971  | -3.145555 | -1.634676 |
| 43 | 8 | 0 | 1.986680  | -3.888711 | -3.441460 |
| 44 | 8 | 0 | 6.029661  | 2.669171  | 1.684919  |
| 45 | 8 | 0 | 3.639690  | 0.126674  | 5.265357  |
| 46 | 8 | 0 | 2.175549  | 3.698060  | 3.393378  |
| 47 | 8 | 0 | 4.436141  | -1.292571 | 1.244214  |
| 48 | 8 | 0 | -3.567765 | -2.842325 | 2.022175  |
| 49 | 8 | 0 | 1.119612  | -5.468046 | -0.385547 |
| 50 | 8 | 0 | -0.563789 | -5.464482 | 3.520760  |
| 51 | 8 | 0 | -3.181194 | -6.265298 | -0.626622 |
| 52 | 8 | 0 | -4.484280 | 2.888346  | 0.960698  |
| 53 | 8 | 0 | -6.178641 | 1.054688  | -2.523119 |
| 54 | 8 | 0 | -6.468081 | -0.733700 | 2.176291  |
| 55 | 8 | 0 | -4.428449 | -2.654048 | -1.036864 |

-----  
Sum of electronic and zero-point Energies= -10409.556782

Sum of electronic and thermal Free Energies= -10409.668914

**Table S17.** The theoretical Cartesian coordinates (in Å) for the structure **BO5-I** using the M06L/DZP method

Standard orientation:

| Center<br>Number | Atomic<br>Number | Atomic<br>Type | Coordinates (Angstroms) |           |           |
|------------------|------------------|----------------|-------------------------|-----------|-----------|
|                  |                  |                | X                       | Y         | Z         |
| 1                | 8                | 0              | -0.746743               | -1.174262 | 0.576793  |
| 2                | 8                | 0              | -1.756043               | 0.057673  | -1.130509 |
| 3                | 8                | 0              | -0.557180               | 2.065520  | -0.601768 |
| 4                | 8                | 0              | 1.286266                | 0.605242  | -0.781068 |
| 5                | 8                | 0              | 1.608202                | -1.306706 | 0.541217  |
| 6                | 6                | 0              | -2.054180               | -2.044878 | -2.957324 |
| 7                | 6                | 0              | -3.522616               | -2.111139 | -0.281956 |
| 8                | 6                | 0              | -3.239055               | -4.285903 | -1.925327 |
| 9                | 6                | 0              | -0.895527               | -3.702834 | -0.626167 |
| 10               | 6                | 0              | 0.526978                | -1.838573 | 5.031990  |
| 11               | 6                | 0              | -1.263137               | -2.433617 | 3.007901  |
| 12               | 6                | 0              | 0.575914                | -0.021957 | 2.972503  |
| 13               | 6                | 0              | -4.190891               | 1.293933  | -1.603441 |
| 14               | 6                | 0              | -2.608140               | 3.832949  | -0.809811 |
| 15               | 6                | 0              | -5.000514               | 3.097935  | 0.288666  |
| 16               | 6                | 0              | -2.946132               | 1.526788  | 1.196038  |
| 17               | 6                | 0              | 1.721928                | 3.630647  | -1.533373 |
| 18               | 6                | 0              | 2.944699                | 4.837596  | 0.577913  |
| 19               | 6                | 0              | 2.991947                | 2.126143  | 0.895677  |
| 20               | 6                | 0              | 0.461916                | 3.808586  | 1.230524  |
| 21               | 6                | 0              | 4.267737                | -1.667430 | -0.138447 |
| 22               | 6                | 0              | 3.857381                | 0.570590  | -2.126946 |
| 23               | 6                | 0              | 4.708796                | -1.951147 | -2.820745 |
| 24               | 6                | 0              | 2.030470                | -1.878606 | -2.325170 |
| 25               | 6                | 0              | 1.722408                | -2.940736 | 2.829433  |
| 26               | 8                | 0              | -2.023155               | 4.782297  | -1.115342 |
| 27               | 8                | 0              | -2.592456               | 0.989873  | 2.164902  |
| 28               | 8                | 0              | -5.967955               | 3.590357  | 0.678168  |
| 29               | 8                | 0              | -4.636998               | 0.609694  | -2.422477 |
| 30               | 8                | 0              | -2.332557               | -2.831273 | 2.822086  |
| 31               | 8                | 0              | 0.661990                | 1.121416  | 2.761481  |
| 32               | 8                | 0              | 0.607834                | -1.870585 | 6.182146  |
| 33               | 8                | 0              | 2.543637                | -3.707861 | 2.561194  |
| 34               | 8                | 0              | -4.305663               | -1.592731 | 0.401042  |
| 35               | 8                | 0              | -3.843542               | -5.199295 | -2.286032 |
| 36               | 8                | 0              | -1.900887               | -1.507823 | -3.968514 |
| 37               | 8                | 0              | 0.022126                | -4.184696 | -0.107113 |

|    |    |   |           |           |           |
|----|----|---|-----------|-----------|-----------|
| 38 | 8  | 0 | 4.056170  | 1.681102  | -2.382128 |
| 39 | 8  | 0 | 1.039863  | -2.333721 | -2.734655 |
| 40 | 8  | 0 | 5.452648  | -2.472571 | -3.531273 |
| 41 | 8  | 0 | 4.746510  | -1.968196 | 0.868350  |
| 42 | 8  | 0 | 1.578182  | 3.795659  | -2.673105 |
| 43 | 8  | 0 | -0.490697 | 4.044259  | 1.840697  |
| 44 | 8  | 0 | 3.607031  | 5.756985  | 0.792507  |
| 45 | 8  | 0 | 3.643374  | 1.253274  | 1.295623  |
| 46 | 5  | 0 | -1.719014 | 1.366471  | -0.734919 |
| 47 | 5  | 0 | -1.462517 | -1.150135 | -0.583341 |
| 48 | 5  | 0 | 0.781725  | 1.815634  | -0.447506 |
| 49 | 5  | 0 | 0.420166  | -1.378133 | 1.226727  |
| 50 | 5  | 0 | 1.980434  | -0.534821 | -0.525115 |
| 51 | 27 | 0 | -3.462363 | 2.318377  | -0.306286 |
| 52 | 27 | 0 | 1.907956  | 3.382281  | 0.216679  |
| 53 | 27 | 0 | 3.512725  | -1.152960 | -1.701852 |
| 54 | 27 | 0 | 0.407993  | -1.760716 | 3.215725  |
| 55 | 27 | 0 | -2.297552 | -2.835655 | -1.349771 |

-----  
Sum of electronic and zero-point Energies= -9681.651766

Sum of electronic and thermal Free Energies= -9681.759257

**Complete Gaussian 09 reference (Reference 48)**

Gaussian 09, Revision B.01, M. J. Frisch, G. W. Trucks, H. B. Schlegel, G. E. Scuseria, M. A. Robb, J. R. Cheeseman, G. Scalmani, V. Barone, B. Mennucci, G. A. Petersson, H. Nakatsuji, M. Caricato, X. Li, H. P. Hratchian, A. F. Izmaylov, J. Bloino, G. Zheng, J. L. Sonnenberg, M. Hada, M. Ehara, K. Toyota, R. Fukuda, J. Hasegawa, M. Ishida, T. Nakajima, Y. Honda, O. Kitao, H. Nakai, T. Vreven, J. A. Montgomery, Jr., J. E. Peralta, F. Ogliaro, M. Bearpark, J. J. Heyd, E. Brothers, K. N. Kudin, V. N. Staroverov, T. Keith, R. Kobayashi, J. Normand, K. Raghavachari, A. Rendell, J. C. Burant, S. S. Iyengar, J. Tomasi, M. Cossi, N. Rega, J. M. Millam, M. Klene, J. E. Knox, J. B. Cross, V. Bakken, C. Adamo, J. Jaramillo, R. Gomperts, R. E. Stratmann, O. Yazyev, A. J. Austin, R. Cammi, C. Pomelli, J. W. Ochterski, R. L. Martin, K. Morokuma, V. G. Zakrzewski, G. A. Voth, P. Salvador, J. J. Dannenberg, S. Dapprich, A. D. Daniels, O. Farkas, J. B. Foresman, J. V. Ortiz, J. Cioslowski and D. J. Fox, Gaussian, Inc., Wallingford CT, 2010.

## References

---

- (1) Velde, G. Te; Bickelhaupt, F. M.; Baerends, E. J.; Fonseca Guerra, C.; van Gisbergen, S. J. A.; Snijders, J. G.; Ziegler, T. *J. Comput. Chem.*, **2001**, *22*, 931.
- (2) Fonseca Guerra, C.; Snijders, J. G.; te Velde, G.; Baerends, E. J. *Theor. Chem. Acc.* **1998**, *99*, 391.
- (3) Radius, U.; Bickelhaupt, F. M.; Ehler, A. W.; Goldberg, N.; Hoffmann, R. *Inorg. Chem.* **1998**, *37*, 1080.
- (4) Ehlers, A. W.; Baerends, E. J.; Bickelhaupt, F. M.; Radius, U. *Chem. Eur. J.* **1998**, *4*, 210.
- (5) Sunderlin, L. S.; Wang, D.; Squires, R. R. *J. Am. Chem. Soc.* **1993**, *115*, 12060.
- (6) Ehlers, A. W.; Frenking, G. *Organometallics* **1995**, *14*, 423.
